# Supplementary material for: A cost-effective and rapid quantitative test of polymyxin B sulphate with a simple and portable pressure meter readout
Source: Royal Society of Chemistry journal article supplement (doi:10.1039/d0ay00935k), 2020-01-01
Supplement: d0ay00935k1.pdf [file d0ay00935k1.pdf]

## **Electronic Supplementary Information**

*For*

**A cost-effective and rapid quantitative testing of polymyxin B sulphate with simple and portable pressure meter readout**

**Xinyue Rao, Huan Jiang, Ling Li, Feng Xiang, and Zhongde Liu\***

*Key Laboratory of Luminescent and Real-Time Analytical Chemistry (Southwest University),  
Ministry of Education, College of Pharmaceutical Science, Southwest University, Chongqing  
400716, China. Tel: +86-23-68251910. Fax: +86-23-68251048. E-mail: lzdzy@swu.edu.cn.*

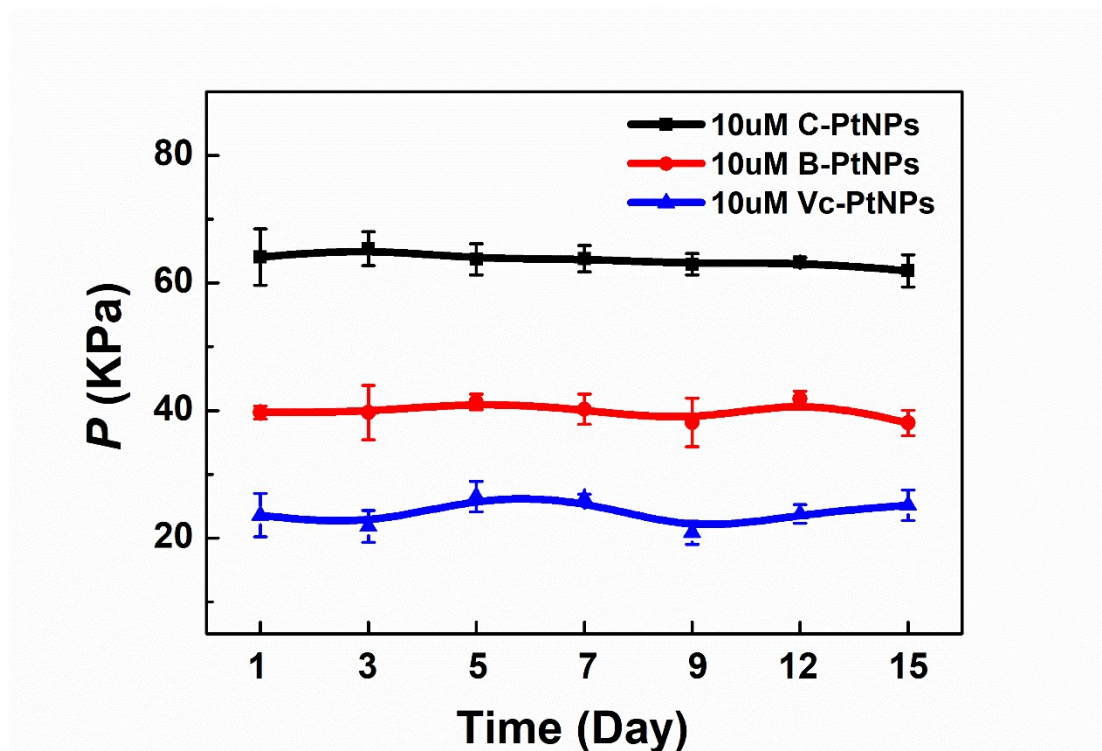

**Fig.S1** The stability of the catalytic activity of the PtNPs under different synthetic protocols. Concentration: PtNPs, 10.0  $\mu\text{M}$ ; 200  $\mu\text{L}$  of 30% (w/v)  $\text{H}_2\text{O}_2$ .

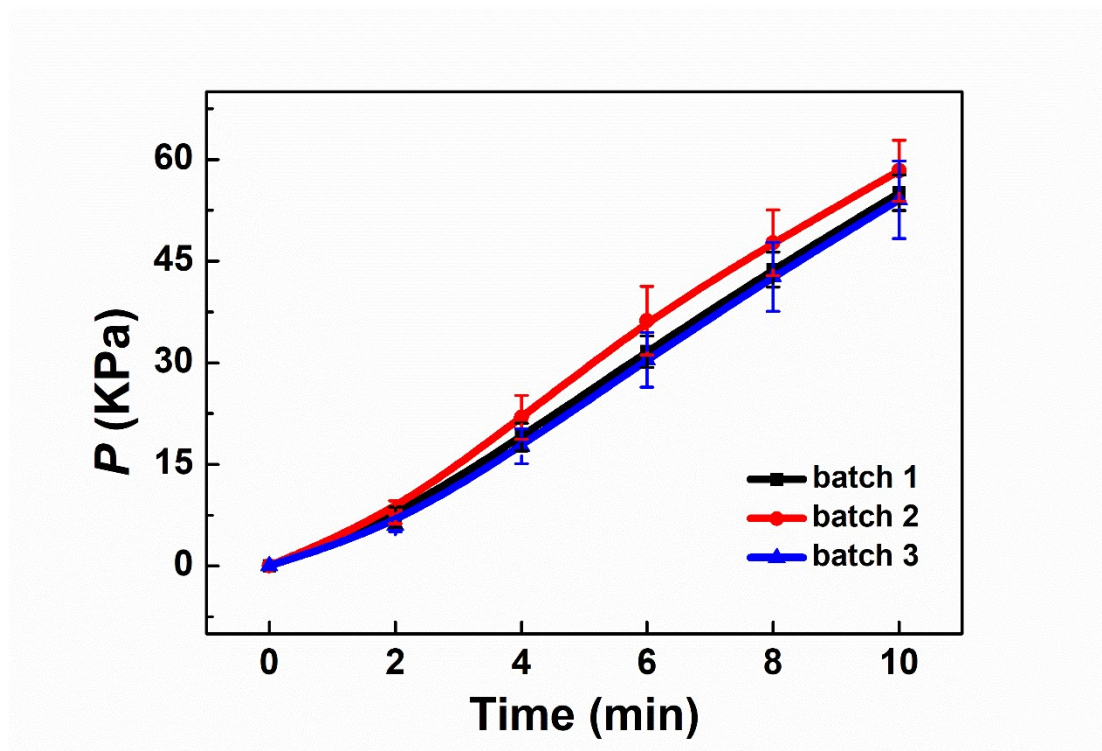

**Fig.S2** The catalytic activity determination of the C-PtNPs between different batches.

Concentration: C-PtNPs, 10.0  $\mu\text{M}$ ; 200  $\mu\text{L}$  of 30% (w/v)  $\text{H}_2\text{O}_2$ .

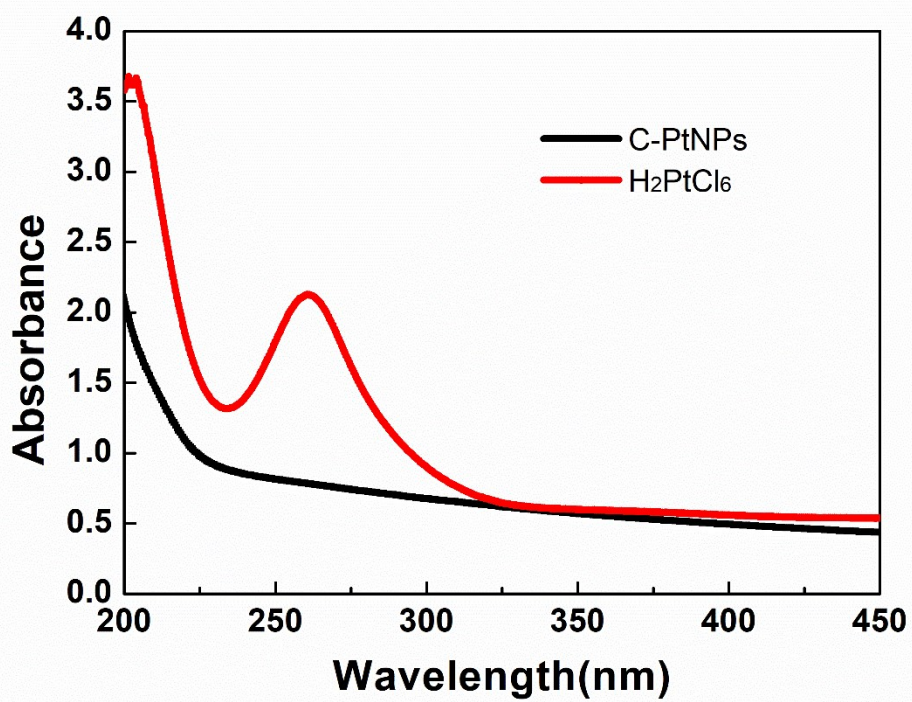

**Fig.S3** UV-vis absorption spectra of the H<sub>2</sub>PtCl<sub>6</sub> and the as-prepared C-PtNPs.

**Table. S1** Comparison of the analytical parameters of the different methods for PMB determination.

| Method                                              | Linear range   | LOD         | Reference             |
|-----------------------------------------------------|----------------|-------------|-----------------------|
| Capillary electrophoresis                           | 24–608 µg/mL   | 14.7µg/mL   | Srisoma et al. (2007) |
| Spectrofluorimetric                                 | 100-1200 ng/mL | 10.31 ng/mL | Kosasy et al. (2015)  |
| Liquid chromatography with tandem mass spectrometry | 50-300 ng/mL   | 15 ng/g     | Zhang et al. (2015)   |
| Resonance rayleigh scattering spectroscopy          | 0.02-6.0 µg/mL | 6.36 ng/mL  | Shen et al. (2013)    |
| Thin-layer chromatography                           | 25-100 ng/mL   | 25 ng/mL    | Sharaf et al. (2002)  |
| Pressure signal detection                           | 0.05-1.0 µM    | 26.8 nM     | this work             |

## REFERENCES

- (1) P. Srisoma, B. Liawruangratha, S. Liawruangrathb, J. M.Slaterc, S. Wangkarn, *J. Pharm. Biomed. Anal.*, **2007**, 43, 1013-1018.
- (2) A. Kosasy, O. Aziz, N. Magdy, N. Zahar, *J Fluoresc*, **2015**, 25, 695-705.
- (3) D. Zhang, Jin. Park, D. Kim, Na. Kim, S. Kim, K. Cho, D. Jeong, Jae. Shim, A. M. Aty, H. Shin, *J. Sep. Sci.*, **2015**, 38, 2371-2380.
- (4) Y. Shen, S. Liu, L. Kong, D. Li, Y. He, *Sens. Actuators B*, **2013**, 188, 555-563.
- (5) M. Sharaf, A. Sanchez, P. White, R. Manning, *J. Liq. Chrom. & Rel. Technol.*, **2002**, 25, 927-935.
